# Supplementary material for: MXene: a promising photocatalyst for water splitting
Source: Royal Society of Chemistry journal article supplement (doi:10.1039/c6ta04414j), 2016-01-01
Supplement: c6ta04414j1.pdf [file c6ta04414j1.pdf]

**Electronic supplementary information**

**MXene: A promising photocatalyst for water splitting**

Zhonglu Guo<sup>1,2</sup>, Jian Zhou<sup>1,\*</sup>, Linggang Zhu<sup>1</sup> and Zhimei Sun<sup>1,2,\*</sup>

<sup>1</sup>School of Materials Science and Engineering, Beihang University, Beijing 100191,  
China

<sup>2</sup>Center for Integrated Computational Materials Engineering, International Research  
Institute for Multidisciplinary Science, Beihang University, Beijing 100191, China

\*Correspondence and requests for materials should be addressed to J. Zhou or Z. M.

Sun: [jzhou@buaa.edu.cn](mailto:jzhou@buaa.edu.cn), [zmsun@buaa.edu.cn](mailto:zmsun@buaa.edu.cn)

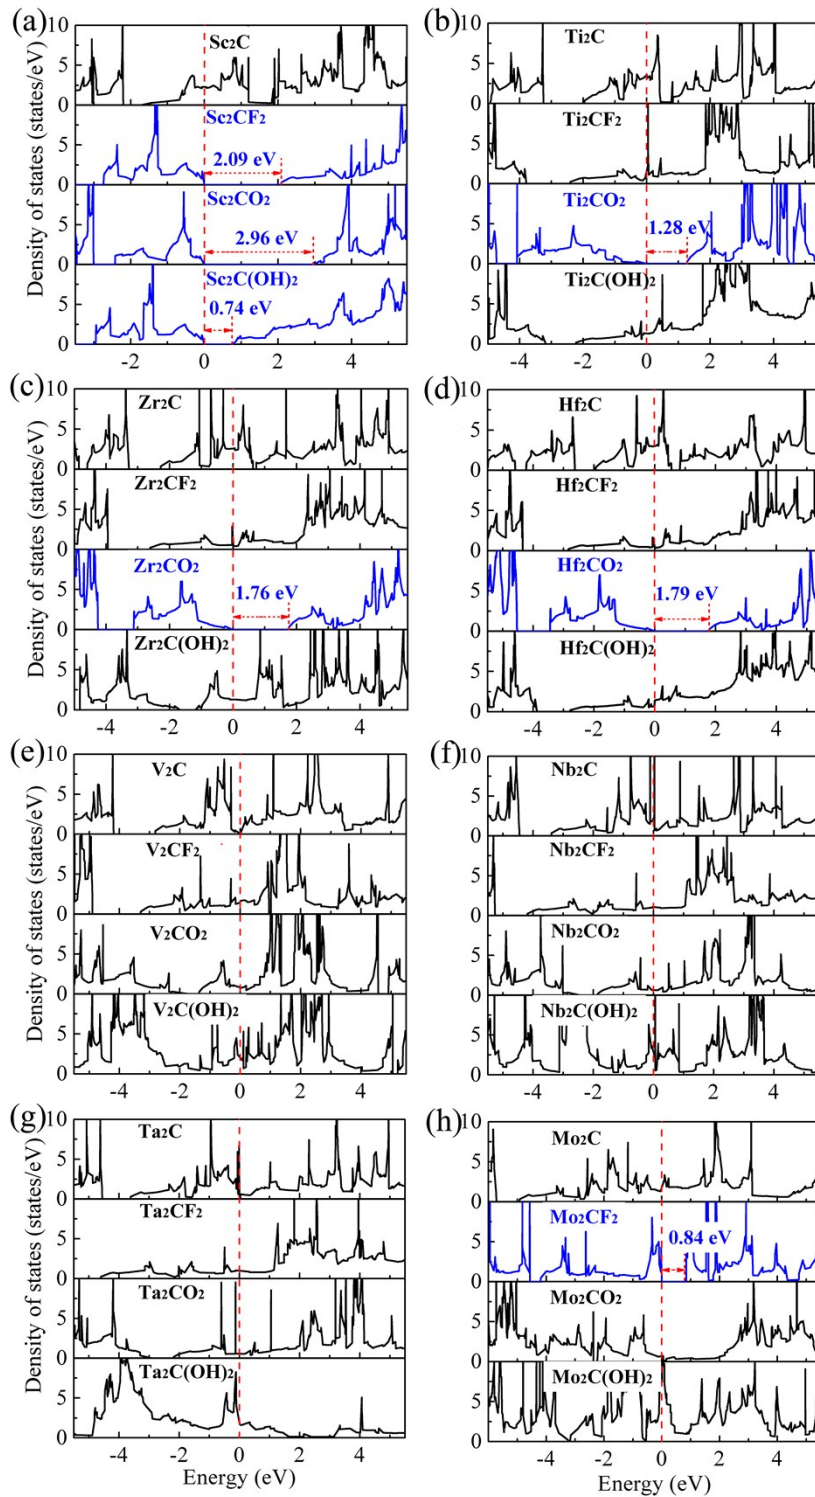

Fig. S1. Calculated (using HSE06) density of states (DOS) of pristine and functionalized 2D (a) Sc<sub>2</sub>C, (b) Ti<sub>2</sub>C, (c) Zr<sub>2</sub>C, (d) Hf<sub>2</sub>C, (e) V<sub>2</sub>C, (f) Nb<sub>2</sub>C, (g) Ta<sub>2</sub>C and (h) Mo<sub>2</sub>C. The Fermi energy is set to 0 eV and indicated by vertical dashed line.

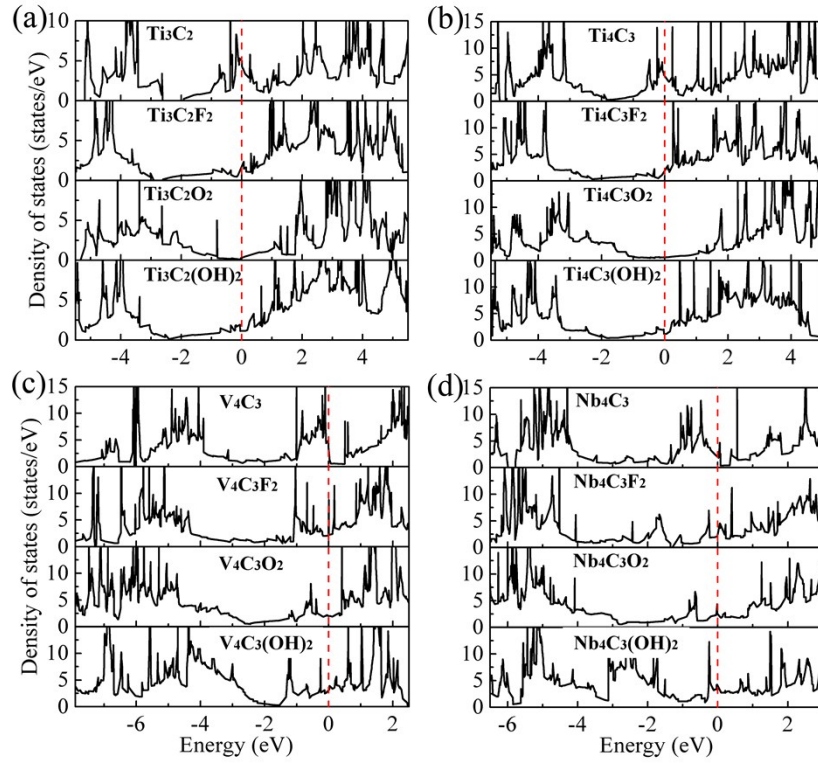

Fig. S2. Calculated (using HSE06) density of states (DOS) of pristine and functionalized 2D (a)  $\text{Ti}_3\text{C}_2$ , (b)  $\text{Ti}_4\text{C}_3$ , (c)  $\text{V}_4\text{C}_3$  and (d)  $\text{Nb}_4\text{C}_3$ . The Fermi energy is set to 0 eV and indicated by vertical dashed line.
